# Supplementary material for: Filling the gaps of uranium oxide hydrates with magnesium(ii) ions: unique layered structures and the role of additional sodium(i) ions
Source: Royal Society of Chemistry journal article supplement (doi:10.1039/d3dt03078d), 2023-01-01
Supplement: d3dt03078d1.pdf [file d3dt03078d1.pdf]

## *Electronic Supplementary Information*

Filling the gaps of uranium oxide hydrates with magnesium(II) ions:  
unique layered structures and the role of additional sodium(I) ions<sup>†</sup>

Yingjie Zhang<sup>\*a</sup>, Kimbal T. Lu<sup>a,b</sup>, Tao Wei<sup>a</sup>, Inna Karatchevtseva,<sup>a</sup> and Rongkun Zheng<sup>b</sup>

<sup>a</sup> *Australian Nuclear Science and Technology Organisation, Locked Bag 2001, Kirrawee DC, NSW 2232, Australia.*

<sup>b</sup> *School of Physics and Advanced Materials, University of Sydney, Ultimo, New South Wales 2007, Australia.*

\* Corresponding author: *Email: [yzx@ansto.gov.au](mailto:yzx@ansto.gov.au)* (Y. Zhang)

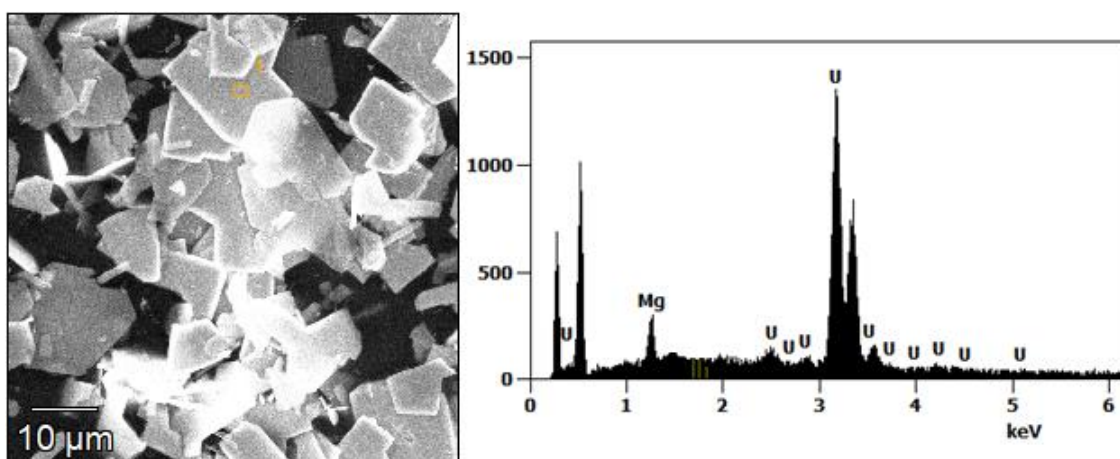

**Fig. S1.** A backscattered SEM image (top) and an EDS spectrum (bottom) of compound **U-Mg1** with U:Mg = 3:1.

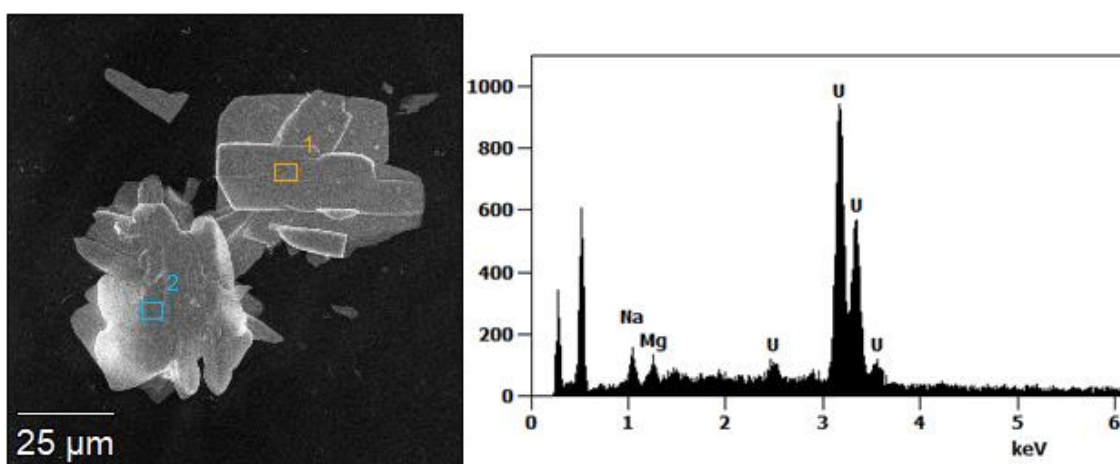

**Fig. S2.** A backscattered SEM image (top) and an EDS spectrum (bottom) of compound **U-Mg2p** with U:Mg:Na = 6:1:2.

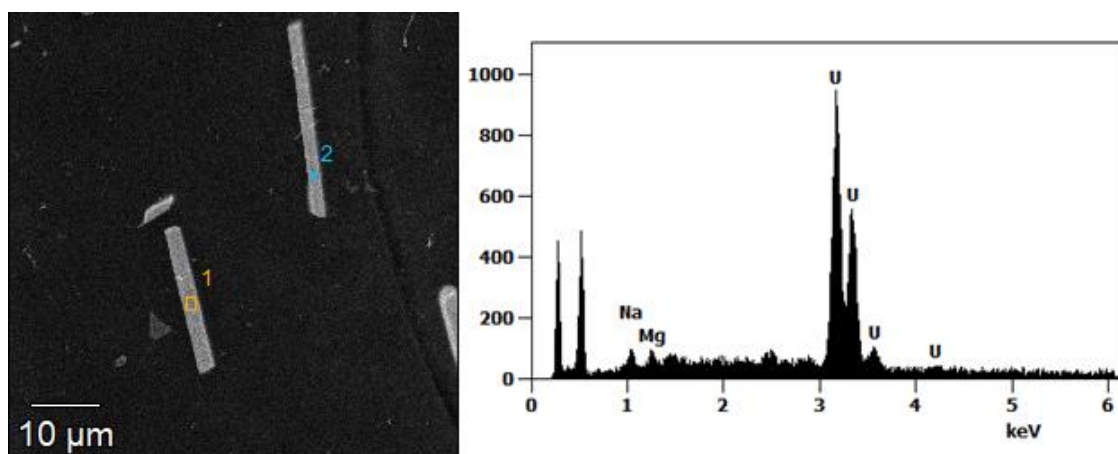

**Fig. S3.** A backscattered SEM image (top) and an EDS spectrum (bottom) of compound **U-Mg<sub>2n</sub>** with U:Mg:Na = 8:1:2.

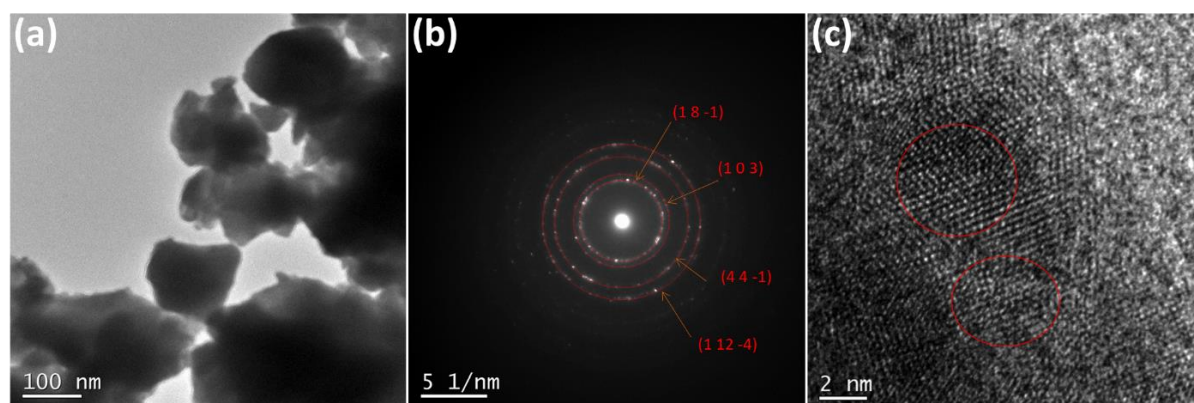

**Fig. S4.** TEM of **U-Mg<sub>1</sub>**: a TEM bright field image of the crushed grains (a); a selected area electron diffraction (SAED) pattern showing crystalline diffractions and rings (b); and a HRTEM image showing lattice fringes with nano-domains in slightly different crystal orientations.

**Table S1.** Bond valence sums (BVS) for cations and anions in compound **U-Mg1**.

|          | U1   | U2   | U3            | U4   | U5            | U6   | Mg1  | Mg2  | $\Sigma$                |
|----------|------|------|---------------|------|---------------|------|------|------|-------------------------|
| Occ      | *    | 1    | 1             | 1    | 1             | 1    | 1    | 1    |                         |
| CN       | #    | 6    | 7             | 7    | 6             | 7    | 7    | 6    | 6                       |
| O1       | 0.99 |      |               |      |               |      |      |      | 0.99                    |
| O2       | 0.93 |      |               |      |               |      |      |      | 0.93                    |
| O3       | 0.93 | 0.57 |               |      |               | 0.56 |      |      | 2.06                    |
| O4       | 0.99 |      |               |      | 0.53          | 0.55 |      |      | 2.07                    |
| O5       | 0.90 | 0.55 | 0.80          |      |               |      |      |      | 2.25                    |
| O6       | 0.85 | 0.63 |               |      |               | 0.55 |      |      | 2.03                    |
| O7       |      | 1.52 |               |      |               |      |      |      | 1.52                    |
| O8       |      | 1.57 |               |      |               |      |      | 0.40 | 1.97                    |
| O9       |      |      | 1.58          |      |               |      | 0.38 |      | 1.96                    |
| O10      |      |      | 1.50          |      |               |      |      |      | 1.50                    |
| O11      |      | 0.67 | 0.60          | 0.80 |               |      |      |      | 2.07                    |
| O12      |      |      | 0.34,<br>0.66 | 0.76 |               |      |      |      | 1.76                    |
| O13      |      |      |               | 1.19 |               |      |      |      | 1.19                    |
| O14      |      |      |               | 1.37 |               |      |      |      | 1.37                    |
| O15      |      |      |               | 0.82 | 0.64,<br>0.58 |      |      |      | 2.04                    |
| O16      |      |      |               | 0.80 | 0.57          | 0.68 |      |      | 2.05                    |
| O17      |      |      |               |      | 1.63          |      |      |      | 1.63                    |
| O18      |      |      |               |      | 1.53          |      | 0.38 |      | 1.91                    |
| O19      |      |      | 0.58          |      | 0.59          |      |      |      | 1.17 (OH)               |
| O20      |      | 0.58 |               |      |               | 0.61 |      |      | 1.19 (OH)               |
| O21      |      |      |               |      |               | 1.50 |      | 0.44 | 1.94                    |
| O22      |      |      |               |      |               | 1.61 |      |      | 1.61                    |
| O23      |      |      |               |      |               |      | 0.40 |      | 0.40 (H <sub>2</sub> O) |
| O24      |      |      |               |      |               |      | 0.36 |      | 0.30 (H <sub>2</sub> O) |
| O25      |      |      |               |      |               |      | 0.40 |      | 0.40 (H <sub>2</sub> O) |
| O26      |      |      |               |      |               |      | 0.37 |      | 0.37 (H <sub>2</sub> O) |
| O27      |      |      |               |      |               |      |      | 0.34 | 0.34 (H <sub>2</sub> O) |
| O28      |      |      |               |      |               |      |      | 0.40 | 0.40 (H <sub>2</sub> O) |
| O29      |      |      |               |      |               |      |      | 0.35 | 0.35 (H <sub>2</sub> O) |
| O30      |      |      |               |      |               |      |      | 0.38 | 0.38 (H <sub>2</sub> O) |
| $\Sigma$ |      | 5.59 | 6.09          | 5.84 | 5.75          | 6.07 | 6.05 | 2.29 | 2.31                    |

**Table S2.** Bond valence sums (BVS) for cations and anions in compound **U-Mg2p**.

|          | U1   | U2   | U3   | U4   | U5   | U6   | Mg1  | Na1           | Na2           | $\Sigma$                |
|----------|------|------|------|------|------|------|------|---------------|---------------|-------------------------|
| Occ      | *    | 1    | 1    | 1    | 1    | 1    | 1    | 1             | 1             |                         |
| CN       | #    | 6    | 7    | 7    | 7    | 7    | 6    | 6             | 8             |                         |
| O1       | 1.50 |      |      |      |      |      |      | 0.12,<br>0.19 | 0.18          | 1.99                    |
| O2       | 1.48 |      |      |      |      |      |      |               |               | 1.48                    |
| O3       | 0.70 |      |      |      | 0.48 | 0.69 |      |               |               | 1.97                    |
| O4       | 0.71 | 0.66 | 0.53 |      |      |      |      |               |               | 1.90                    |
| O5       | 0.69 | 0.71 | 0.70 |      |      |      |      |               |               | 2.10                    |
| O6       |      | 1.47 |      |      |      |      |      | 0.10,<br>0.21 | 0.12          | 1.90                    |
| O7       |      | 1.56 |      |      |      |      |      |               |               | 1.56                    |
| O8       |      | 0.58 |      |      |      | 0.58 |      |               |               | 1.16 (OH)               |
| O9       |      | 0.26 | 0.52 | 0.55 |      |      |      |               |               | 1.43 (OH)               |
| O10      |      | 0.71 | 0.70 | 0.74 |      |      |      |               | 0.08          | 2.15                    |
| O11      |      |      |      | 1.50 |      |      |      |               | 0.12,<br>0.16 | 1.78                    |
| O12      |      |      |      | 1.54 |      |      |      |               |               | 1.54                    |
| O13      |      |      |      | 0.76 | 0.75 | 0.71 |      |               |               | 2.22                    |
| O14      |      |      | 0.21 | 0.29 | 0.46 |      |      |               |               | 0.96 (OH)               |
| O15      |      |      |      |      | 1.55 |      |      |               | 0.18          | 1.73                    |
| O16      |      |      |      |      | 1.56 |      |      |               |               | 1.56                    |
| O17      |      |      |      | 0.53 | 0.50 | 0.30 |      |               |               | 1.33 (OH)               |
| O18      |      |      | 1.58 |      |      |      |      | 0.23          | 0.20          | 2.02                    |
| O19      |      |      | 1.60 |      |      |      | 0.40 |               |               | 2.00                    |
| O20      |      |      |      |      |      | 1.50 | 0.40 |               |               | 1.90                    |
| O21      |      |      |      |      |      | 1.50 |      | 0.17          |               | 1.67                    |
| O22      | 0.67 |      |      |      | 0.67 | 0.70 |      |               | 0.10          | 2.14                    |
| O23      |      |      |      |      |      |      | 0.31 |               |               | 0.31 (H <sub>2</sub> O) |
| O24      |      |      |      |      |      |      | 0.38 |               |               | 0.38 (H <sub>2</sub> O) |
| O25      |      |      |      |      |      |      | 0.36 |               |               | 0.36 (H <sub>2</sub> O) |
| O26      |      |      |      |      |      |      | 0.35 |               |               | 0.35 (H <sub>2</sub> O) |
| $\Sigma$ | 5.75 | 5.97 | 5.85 | 5.92 | 5.97 | 5.97 | 2.21 | 1.02          | 1.14          |                         |

**Table S3.** Bond valence sums (BVS) for cations and anions in compound **U-Mg2n**.

|          | U1            | U2            | U3            | U4            | Mg1           | Na1  | $\Sigma$                |
|----------|---------------|---------------|---------------|---------------|---------------|------|-------------------------|
| Occ      | *             | 1             | 1             | 1             | 0.5           | 1    |                         |
| CN       | #             | 7             | 7             | 6             | 6             | 6    |                         |
| O1       | 1.61          |               |               |               |               |      | 1.66                    |
| O2       | 1.65          |               |               |               |               | 0.19 | 1.84                    |
| O3       | 0.53,<br>0.34 | 0.44          |               |               |               |      | 1.31 (OH)               |
| O4       | 0.60          |               | 0.48          |               |               |      | 1.08 (OH)               |
| O5       | 0.80          | 0.66,<br>0.69 |               |               |               |      | 2.15                    |
| O6       | 0.37          | 0.41          |               | 0.44          |               |      | 1.22 (OH)               |
| O7       |               | 1.57          |               |               |               | 0.15 | 1.72                    |
| O8       |               | 1.62          |               |               |               | 0.10 | 1.72                    |
| O9       |               | 0.60          | 0.58          |               |               |      | 1.18 (OH)               |
| O10      |               |               | 1.56          |               |               | 0.18 | 1.74                    |
| O11      |               |               | 1.56          |               | 0.37,<br>0.37 |      | 1.93                    |
| O12      |               |               | 0.40,<br>0.64 | 0.80          |               |      | 1.84                    |
| O13      |               |               |               | 1.44          |               | 0.05 | 1.49                    |
| O14      |               |               |               | 1.58          |               | 0.17 | 1.75                    |
| O15      |               |               | 0.62          | 0.74,<br>0.62 |               |      | 1.98                    |
| O16      |               |               |               |               | 0.38,<br>0.38 |      | 0.76 (H <sub>2</sub> O) |
| O17      |               |               |               |               | 0.32,<br>0.32 |      | 0.64 (H <sub>2</sub> O) |
| $\Sigma$ | 5.90          | 6.00          | 5.86          | 5.62          | 2.13          | 0.85 |                         |
